# Supplementary material for: Improving Phylogeny Reconstruction at the Strain Level Using Peptidome Datasets
Source: PubMed Central journal article supplement (PMC5198984; doi:10.1371/journal.pcbi.1005271), 2016-12-29

# ML tree

dataset: cyto28-more  
branch support: ML (left), MP (right)

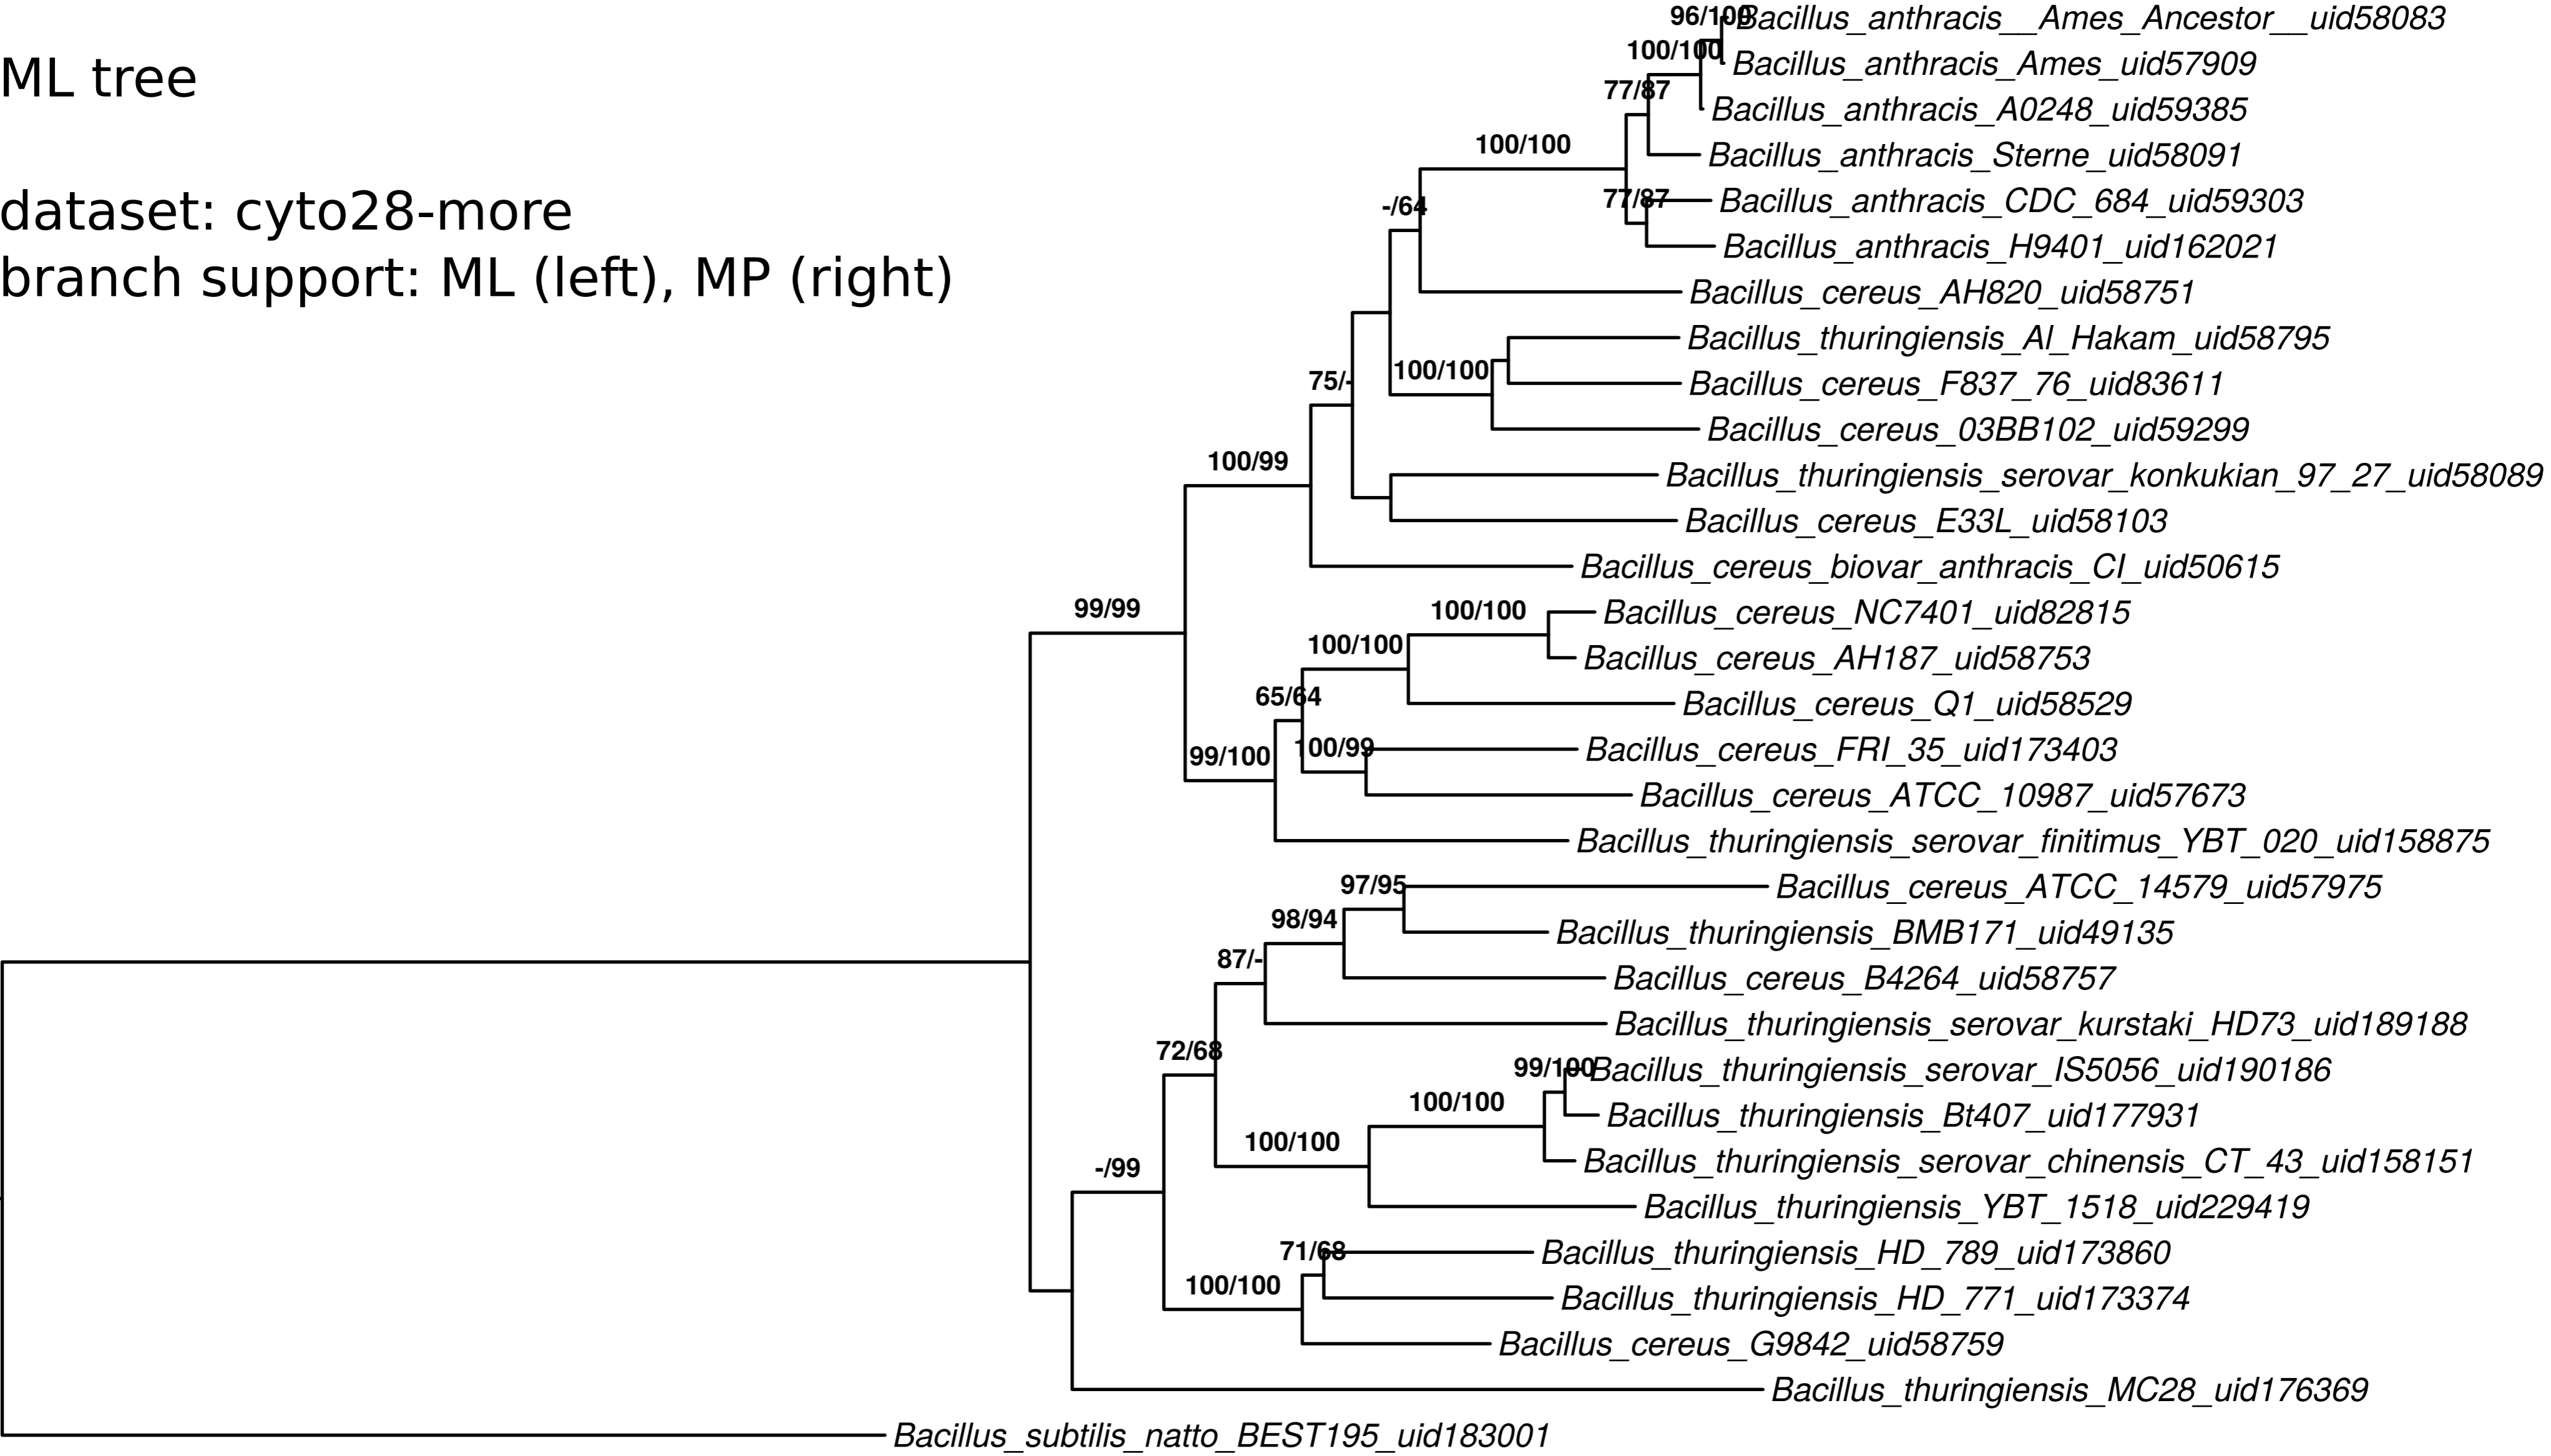

0.06

MP tree

dataset: cyto28-more  
branch support: MP

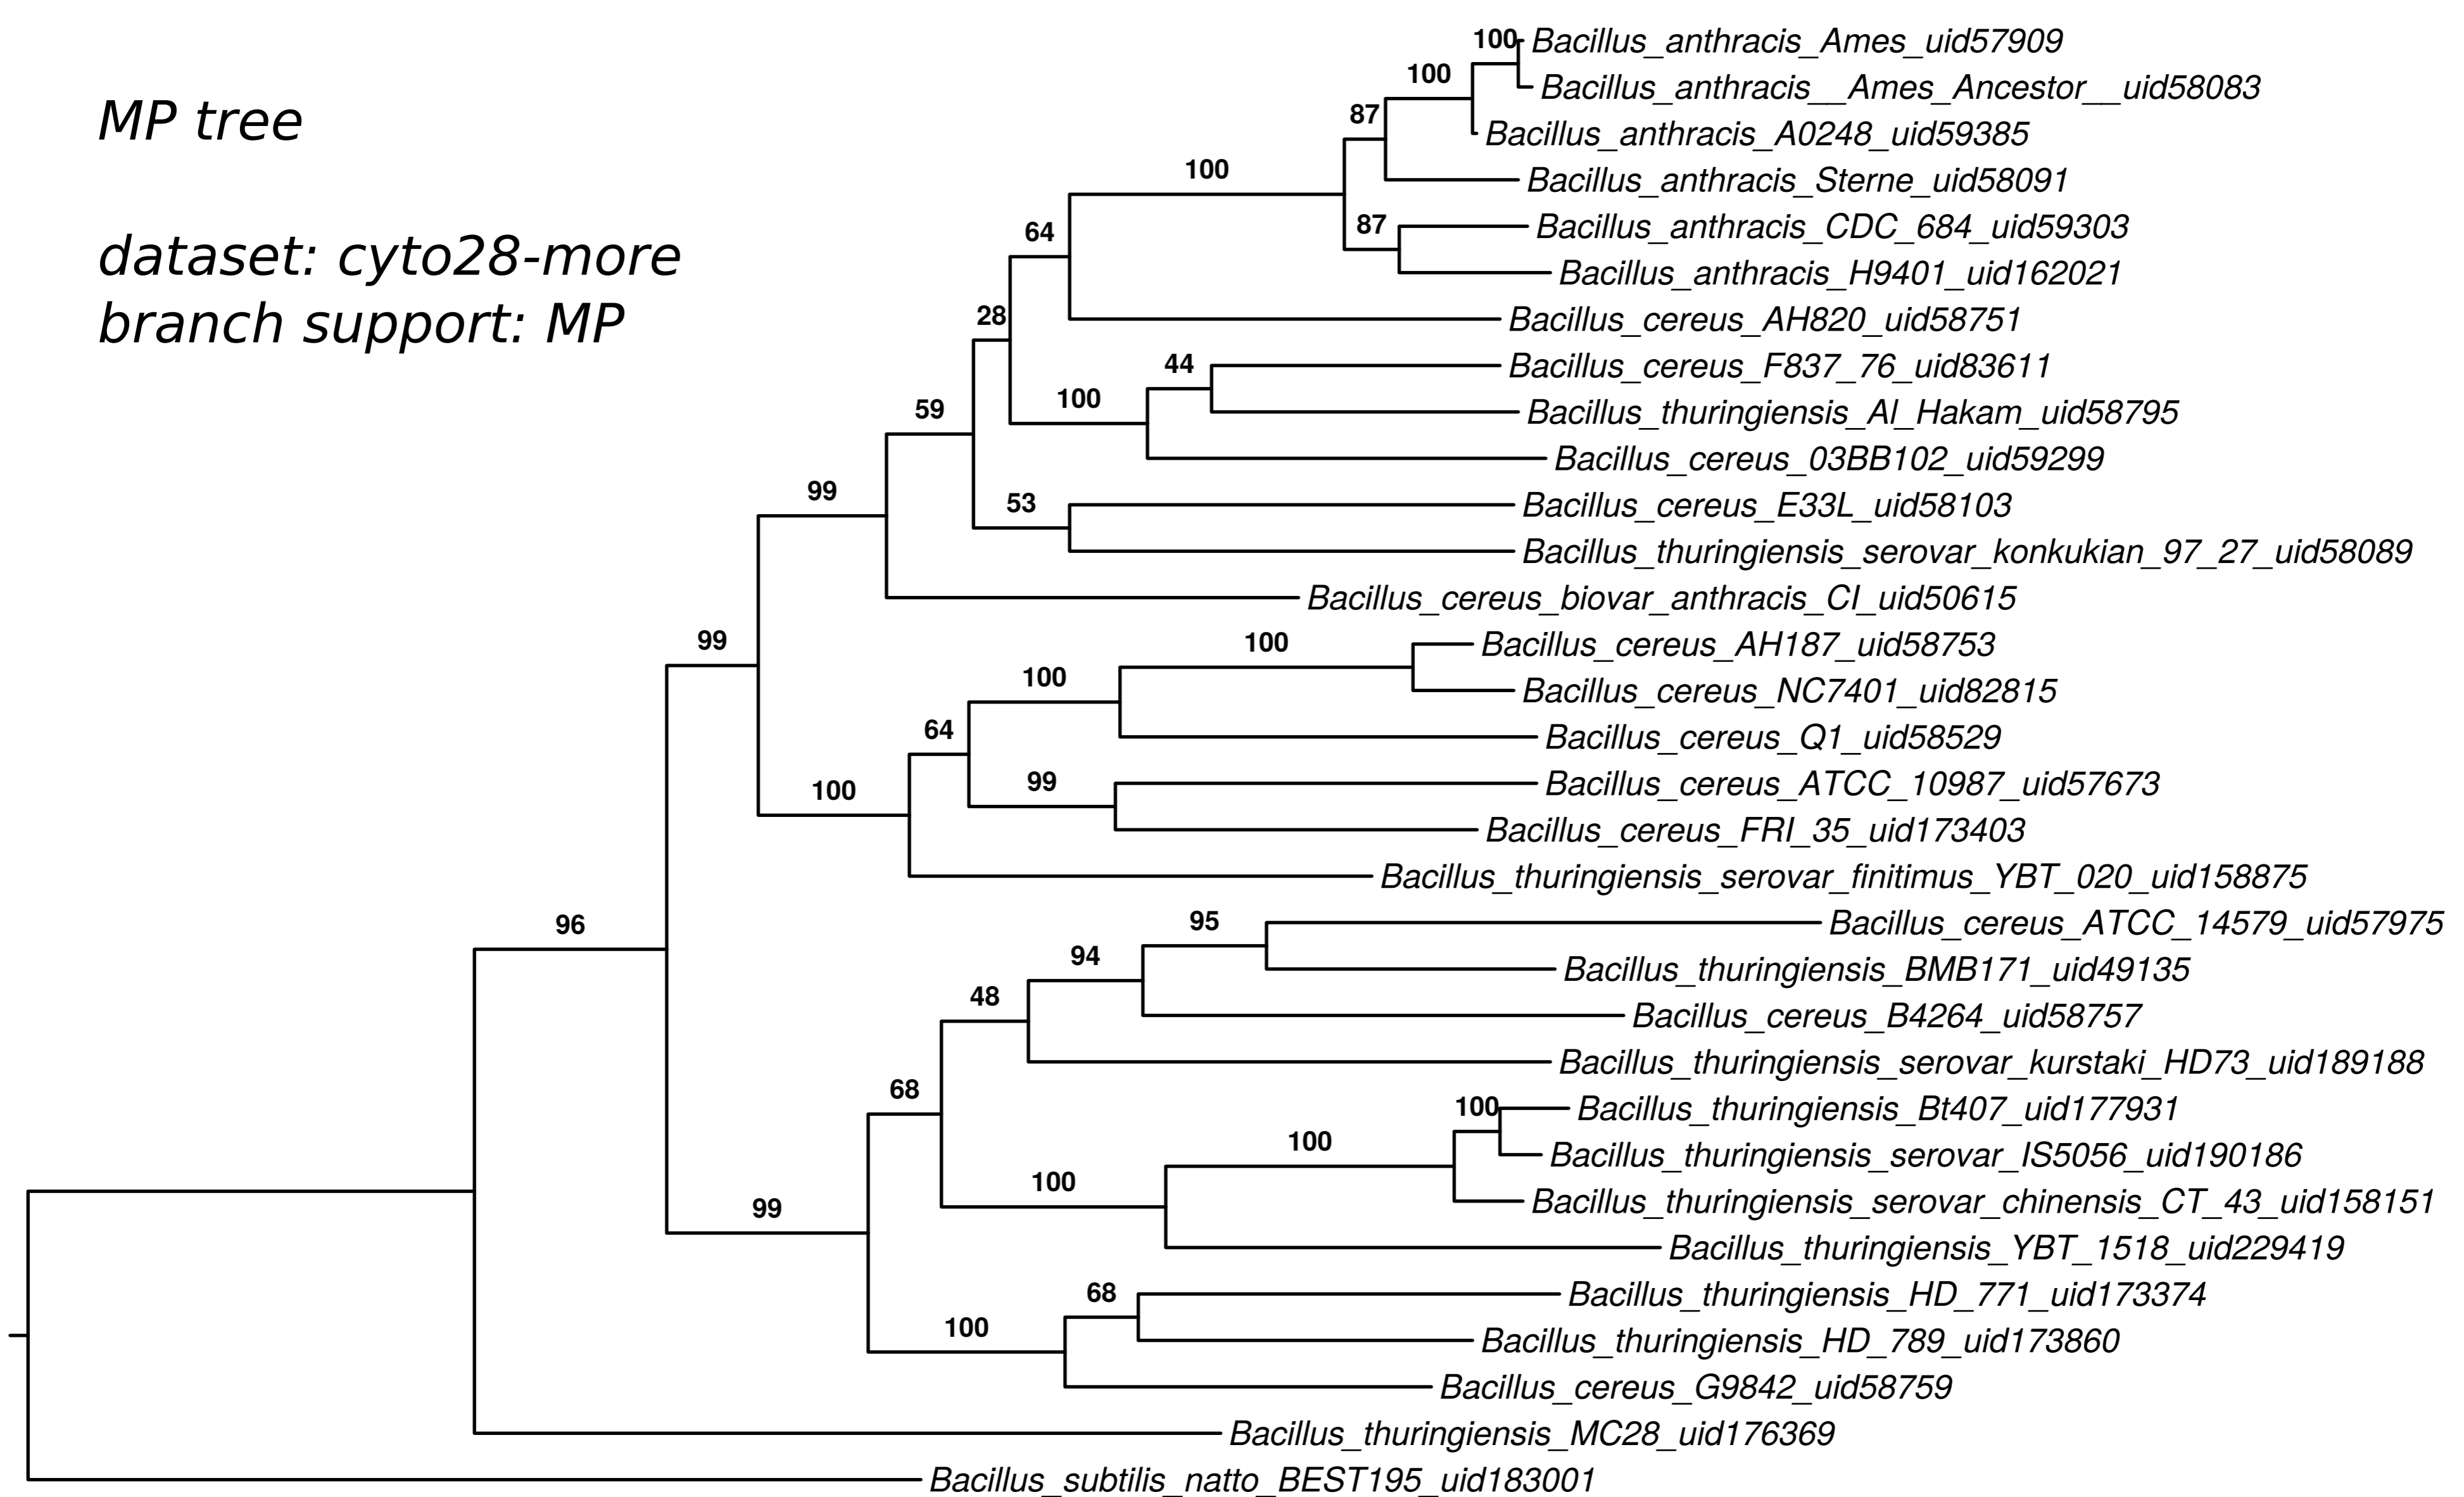

ML tree

dataset: cyto\_PI\_51-60

branch support: ML (left), MP (right)

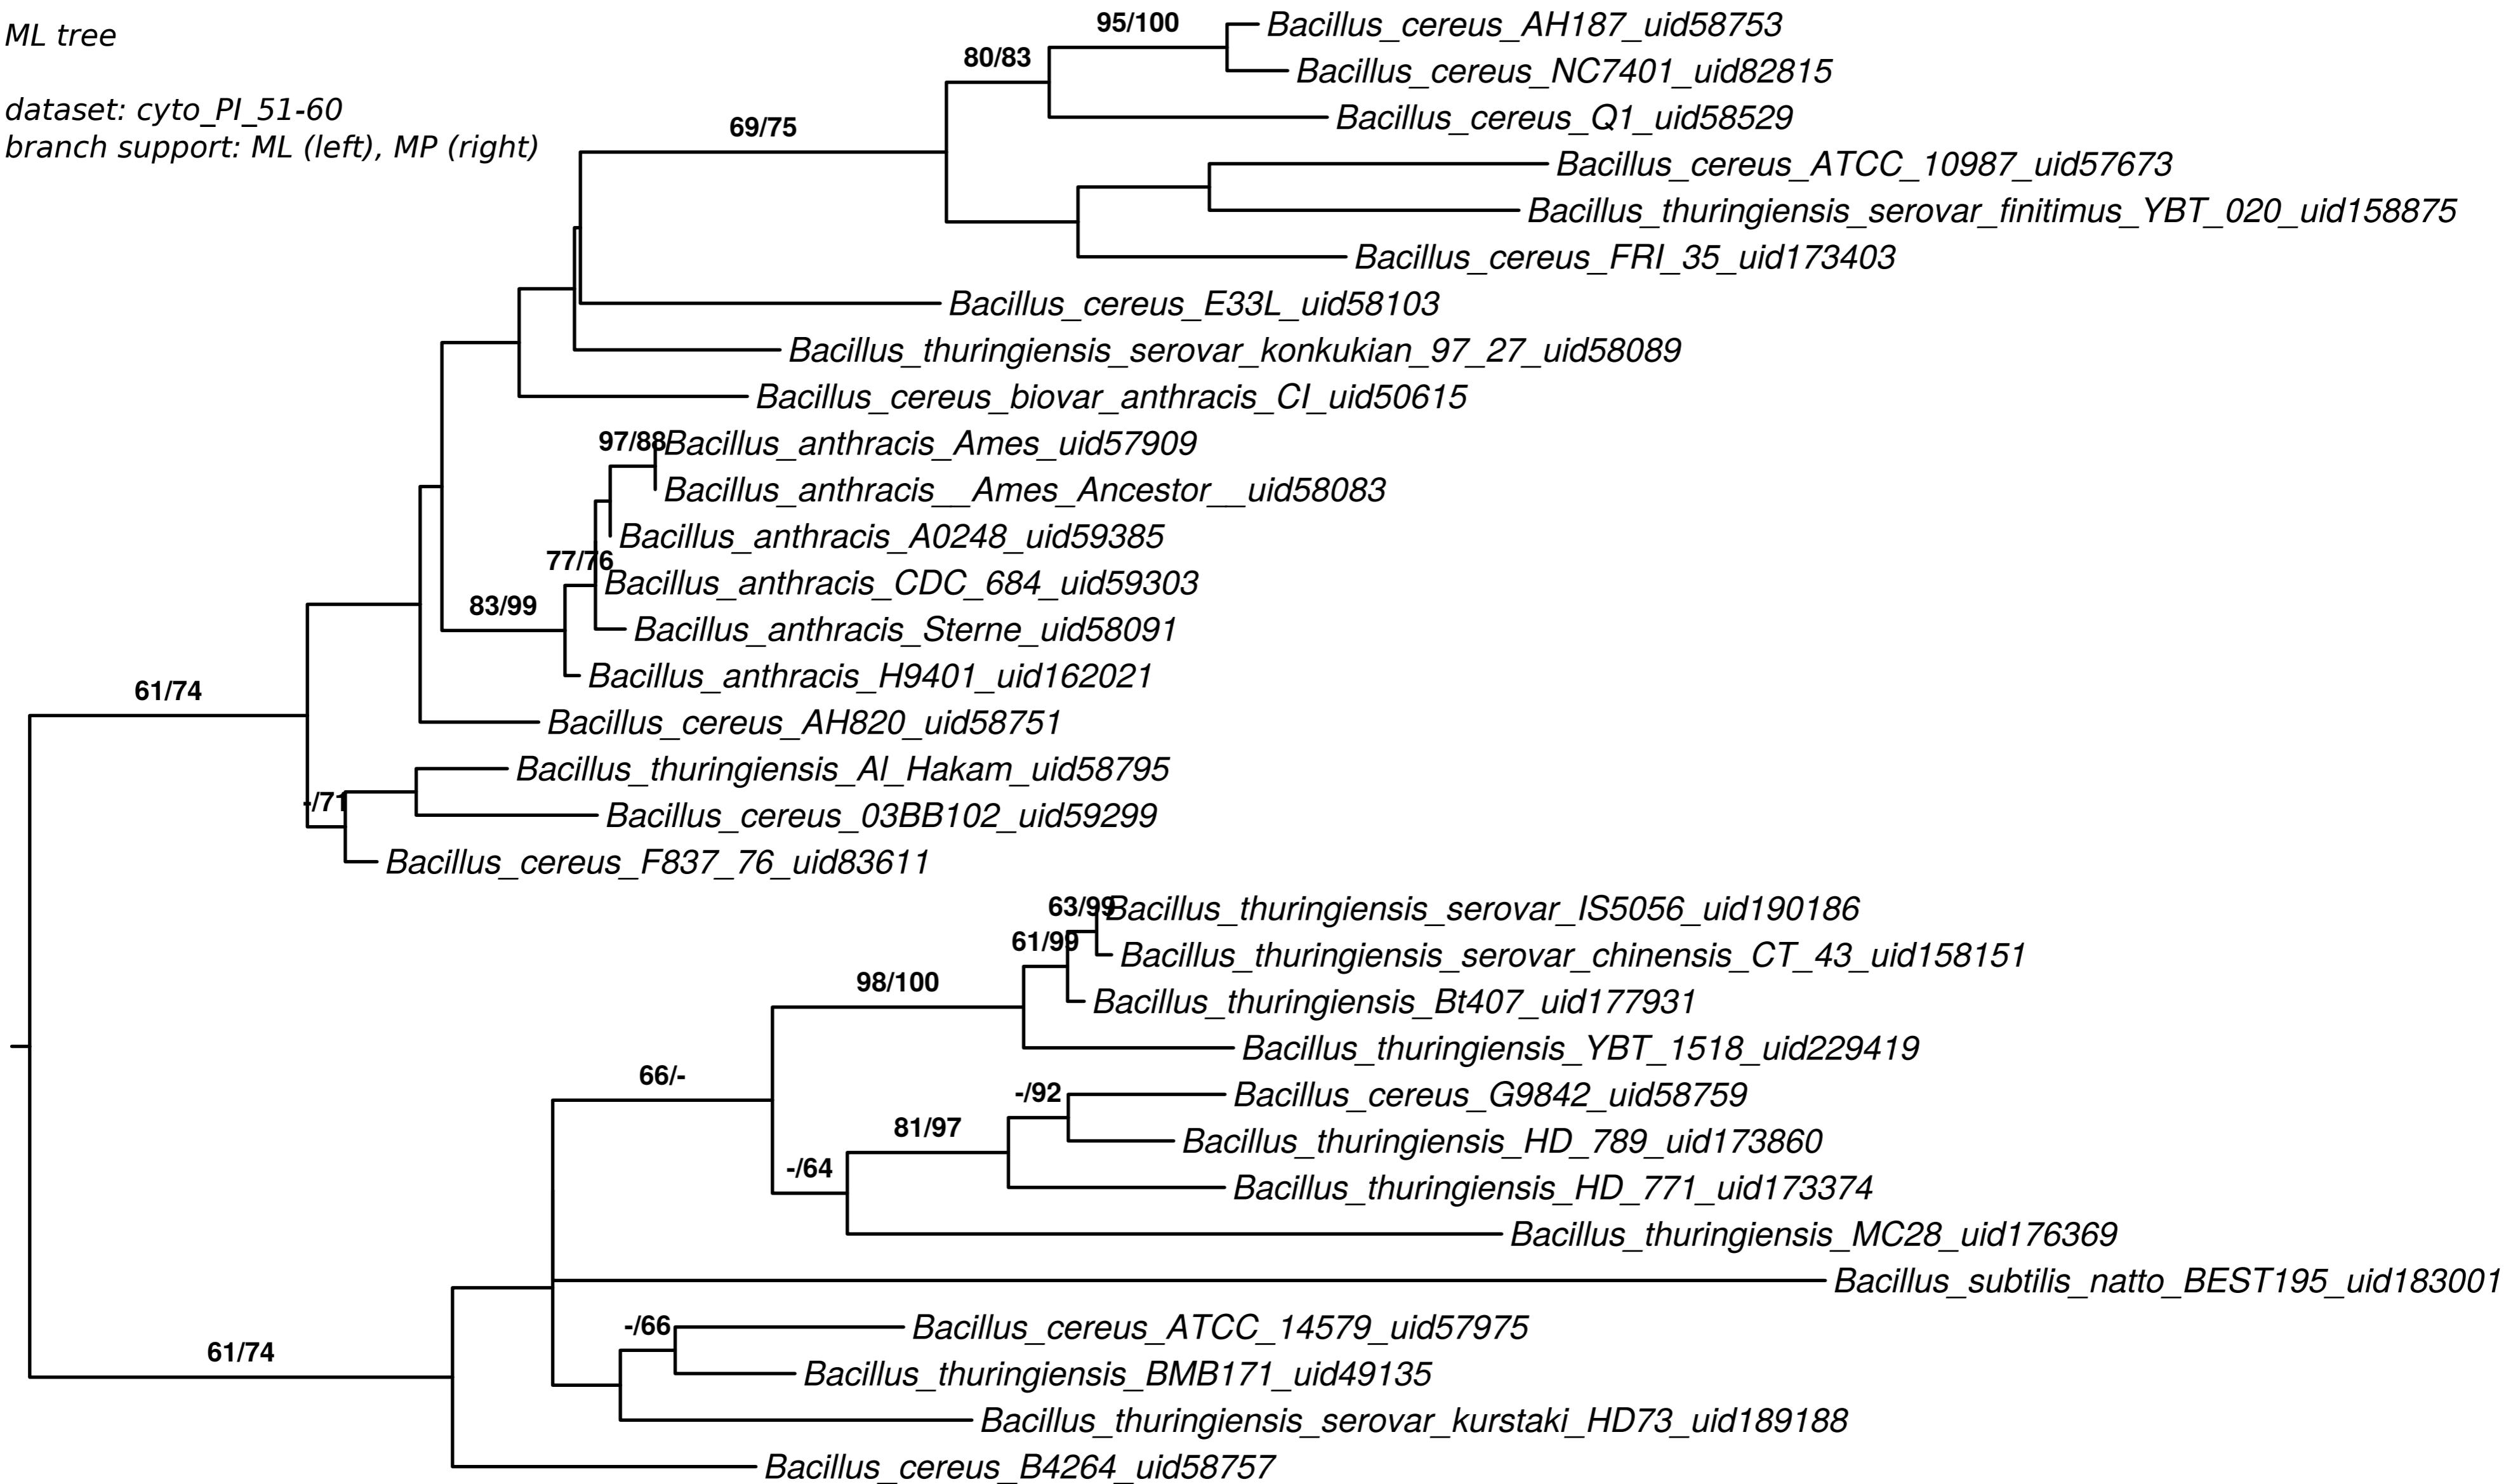

# MP tree

dataset: cyto\_PI\_51-60

branch support: MP

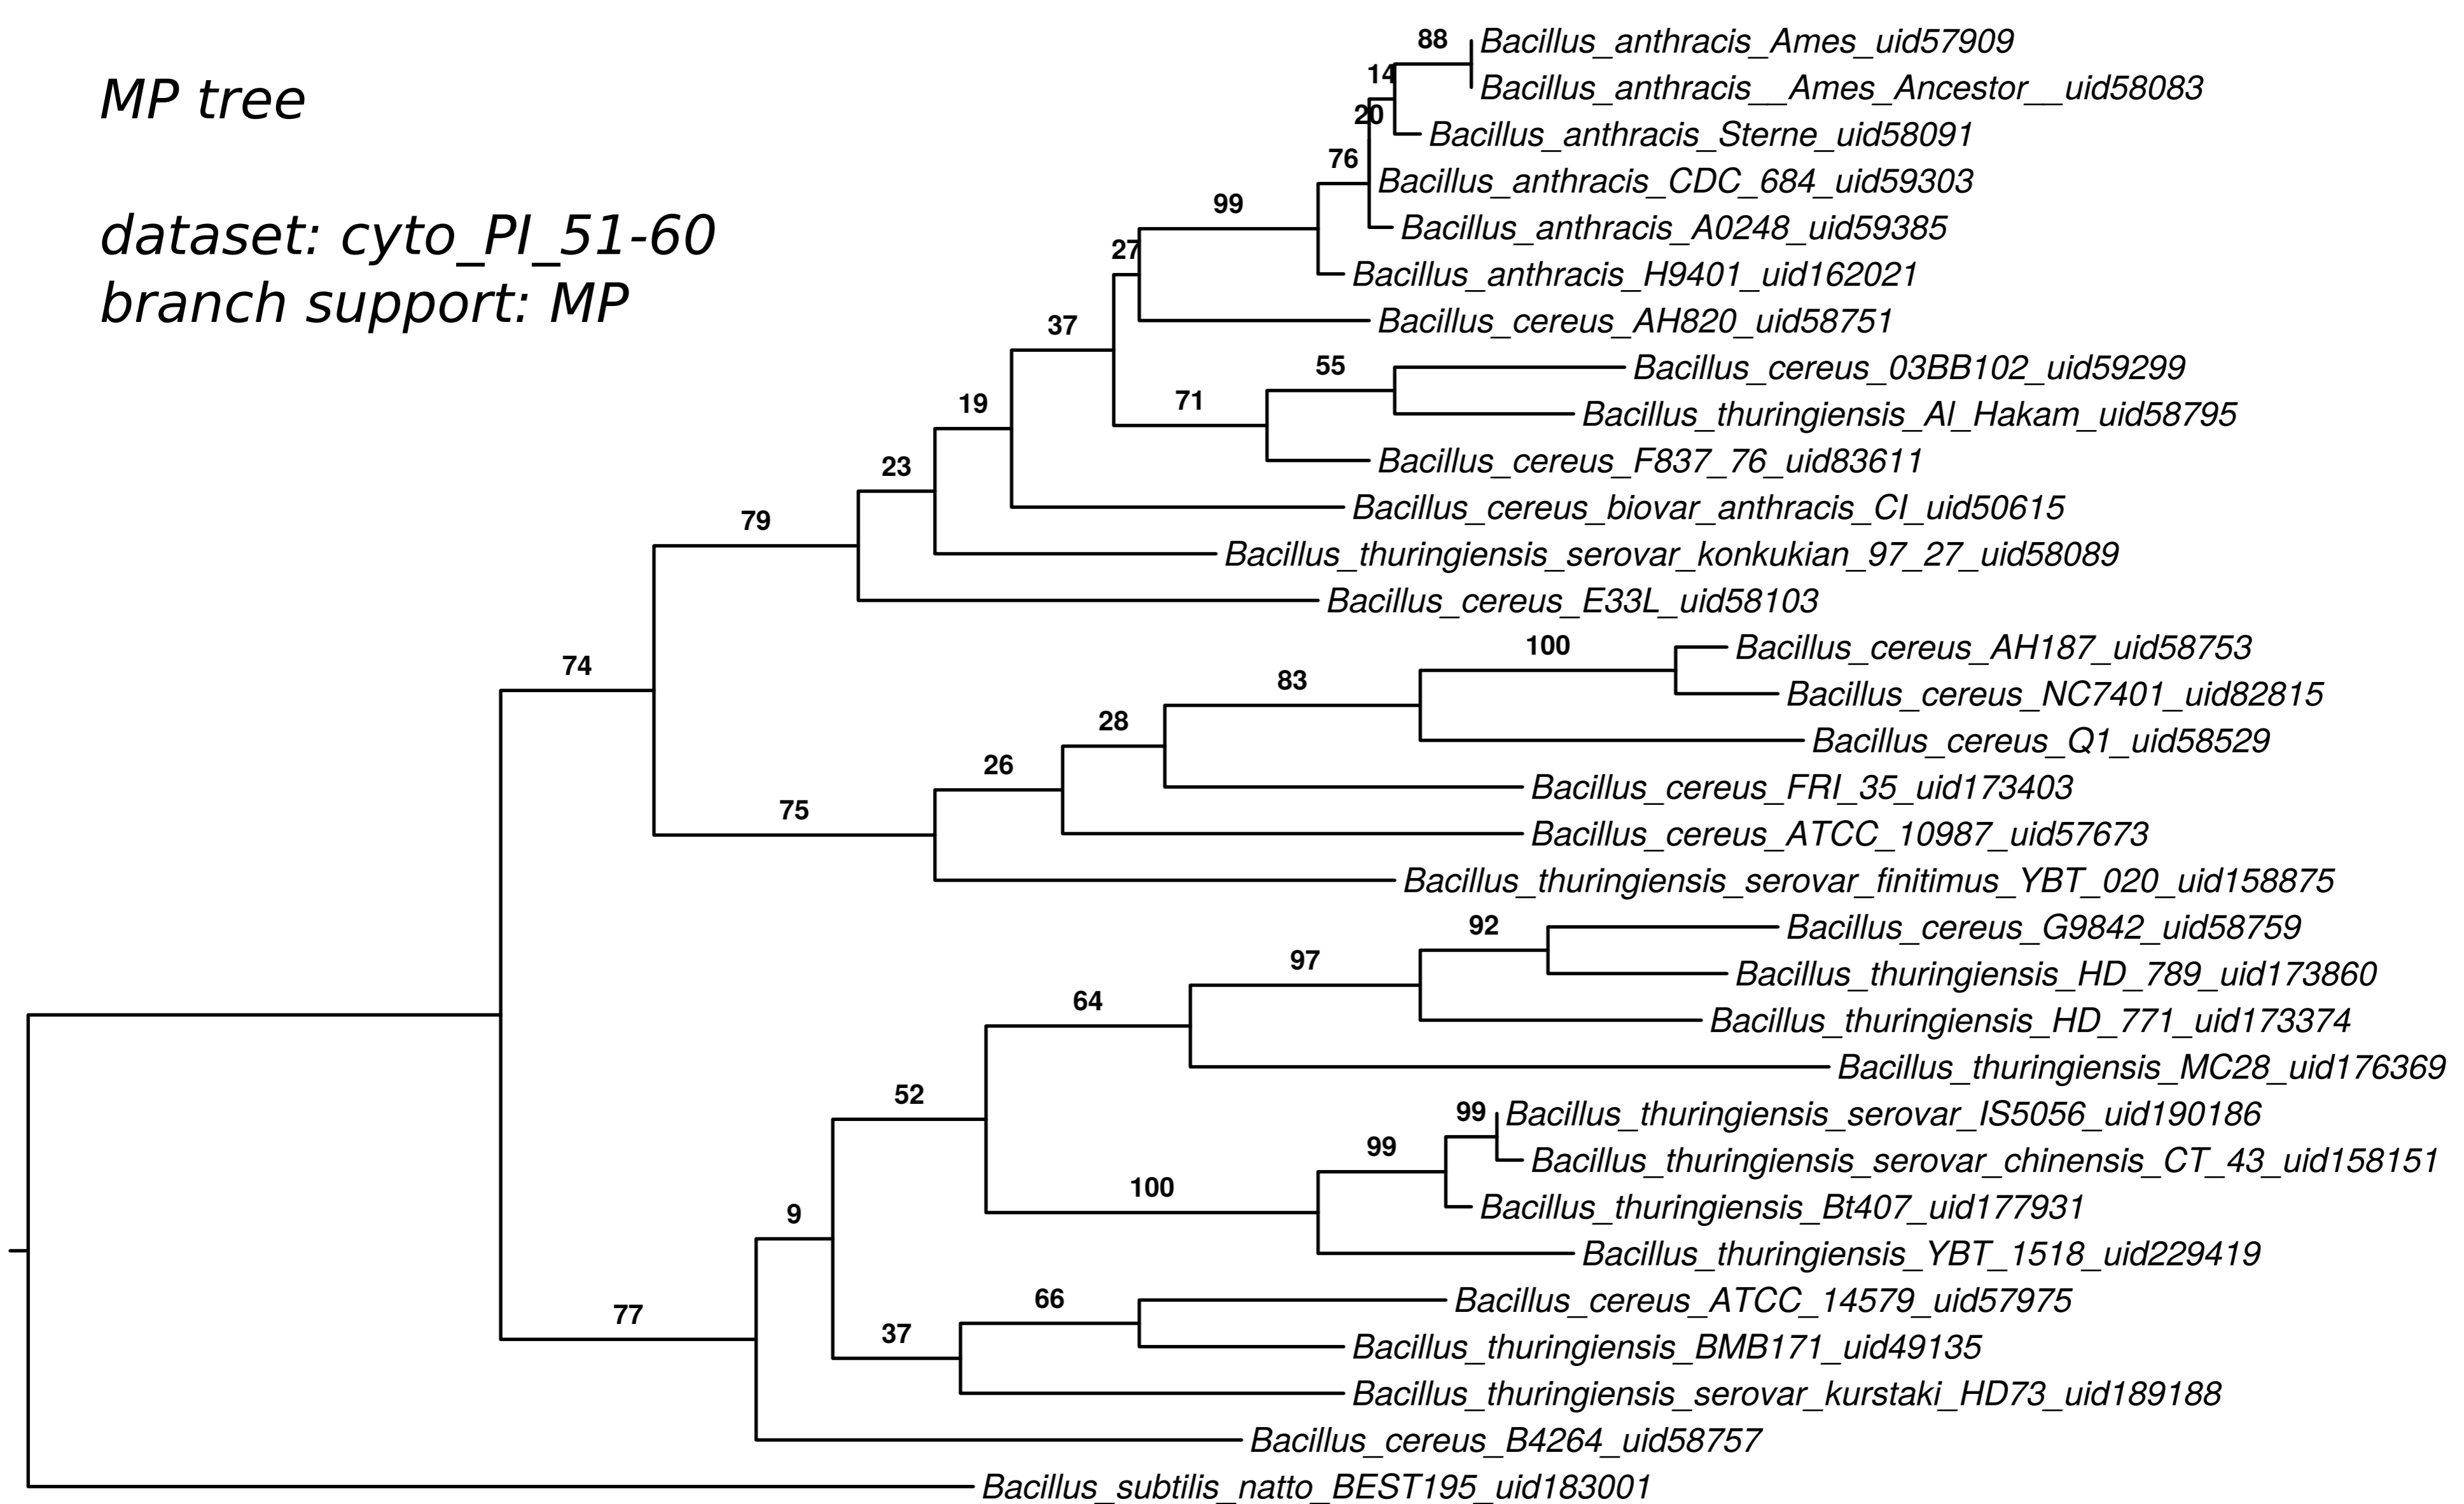

6.0

# ML tree

dataset: cyto\_PI\_60-more

branch support: ML (left), MP (right)

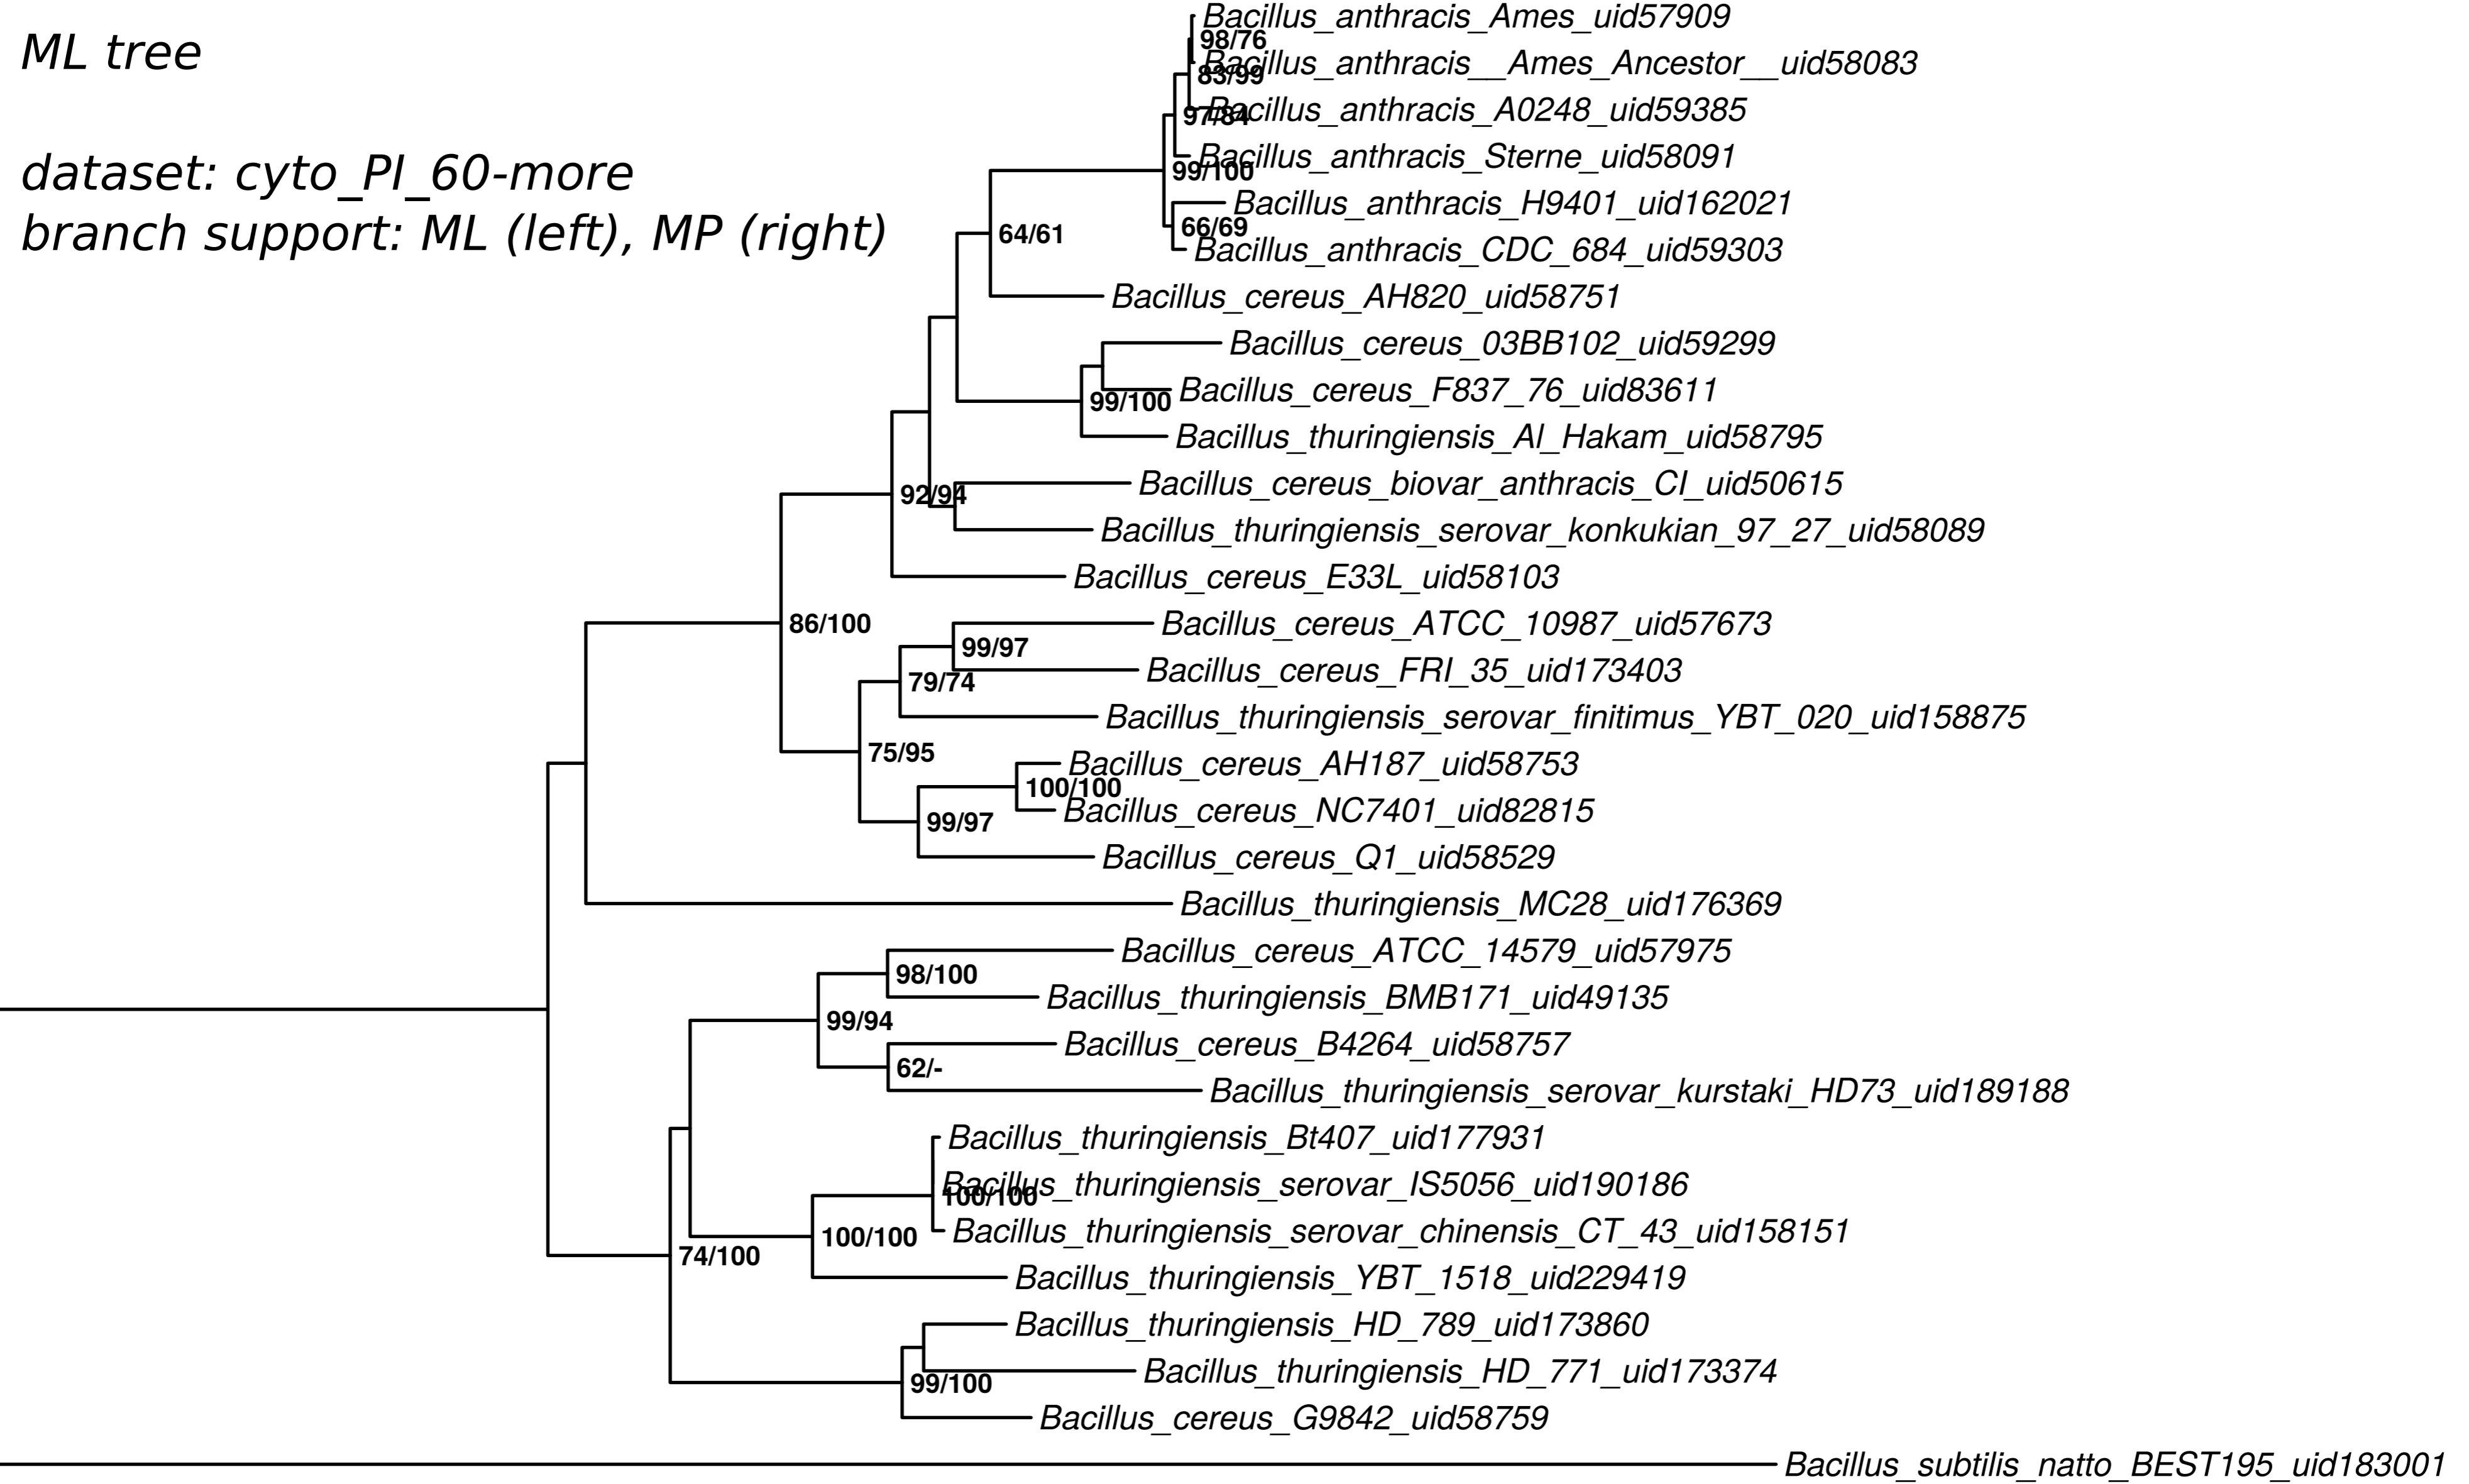

0.08

MP tree

dataset: cyto\_PI\_60-more

branch support: MP

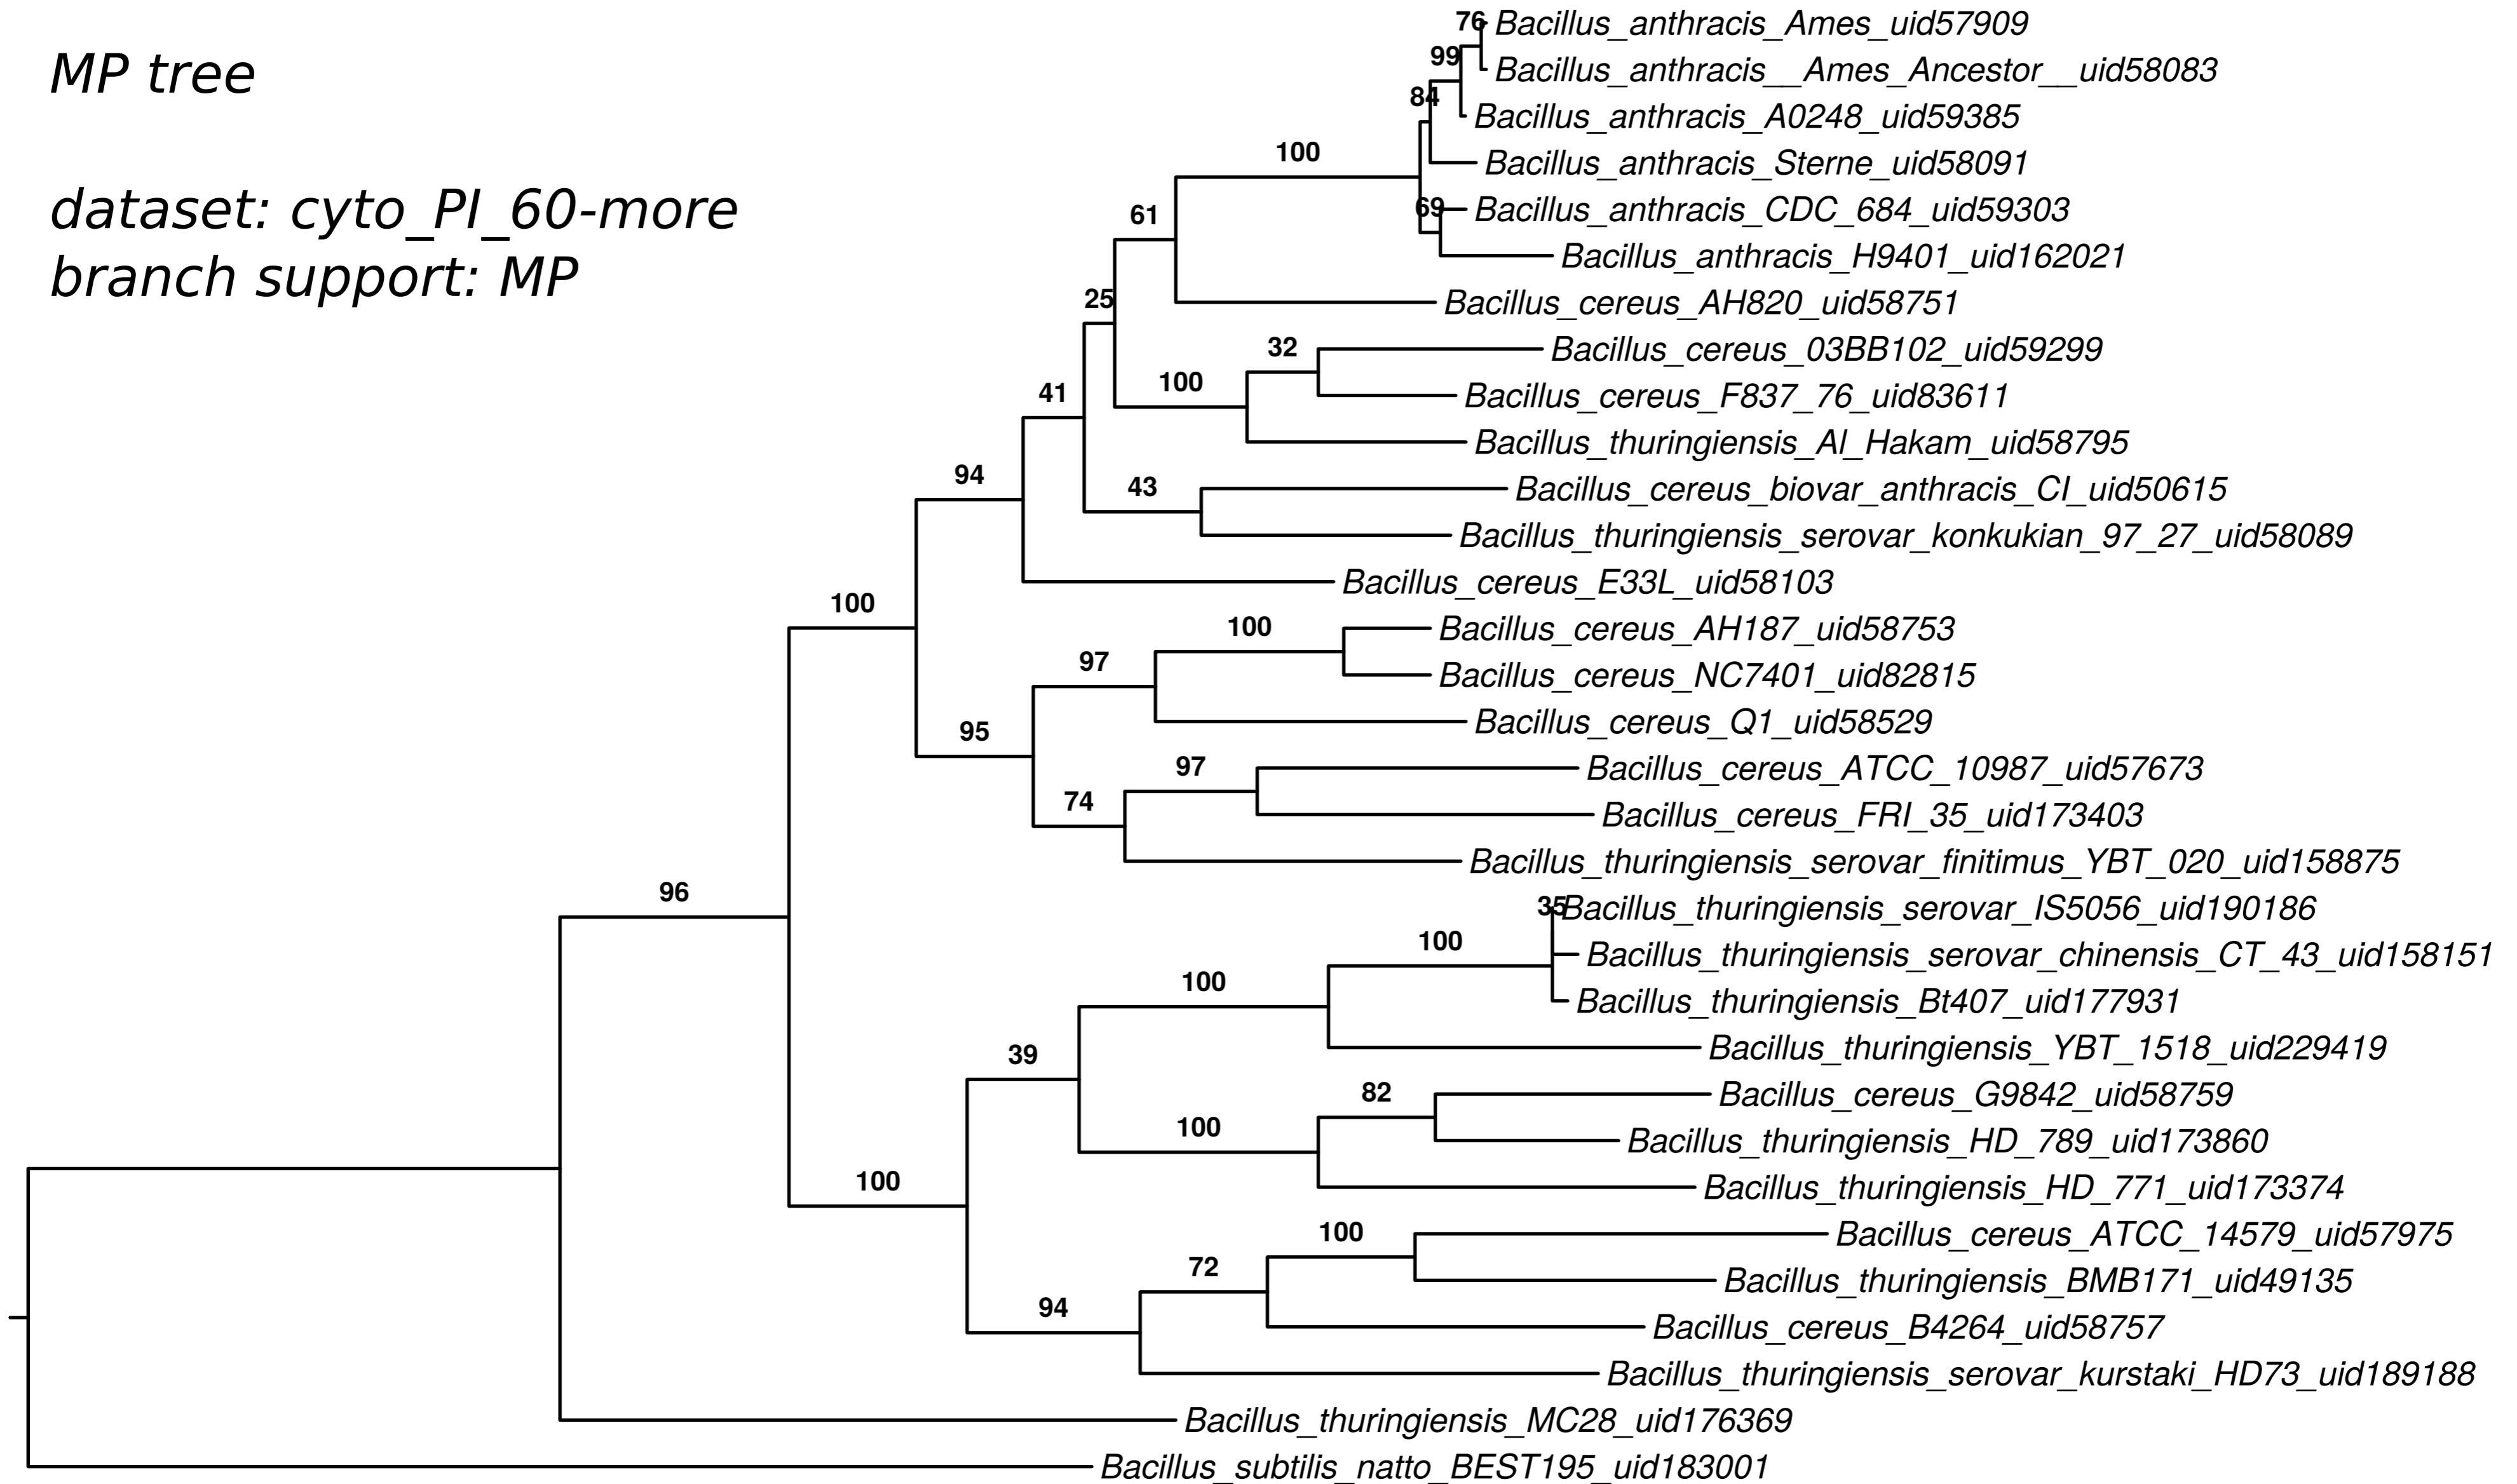

30.0

# ML tree

dataset: extracellular

branch support: ML (left), MP (right)

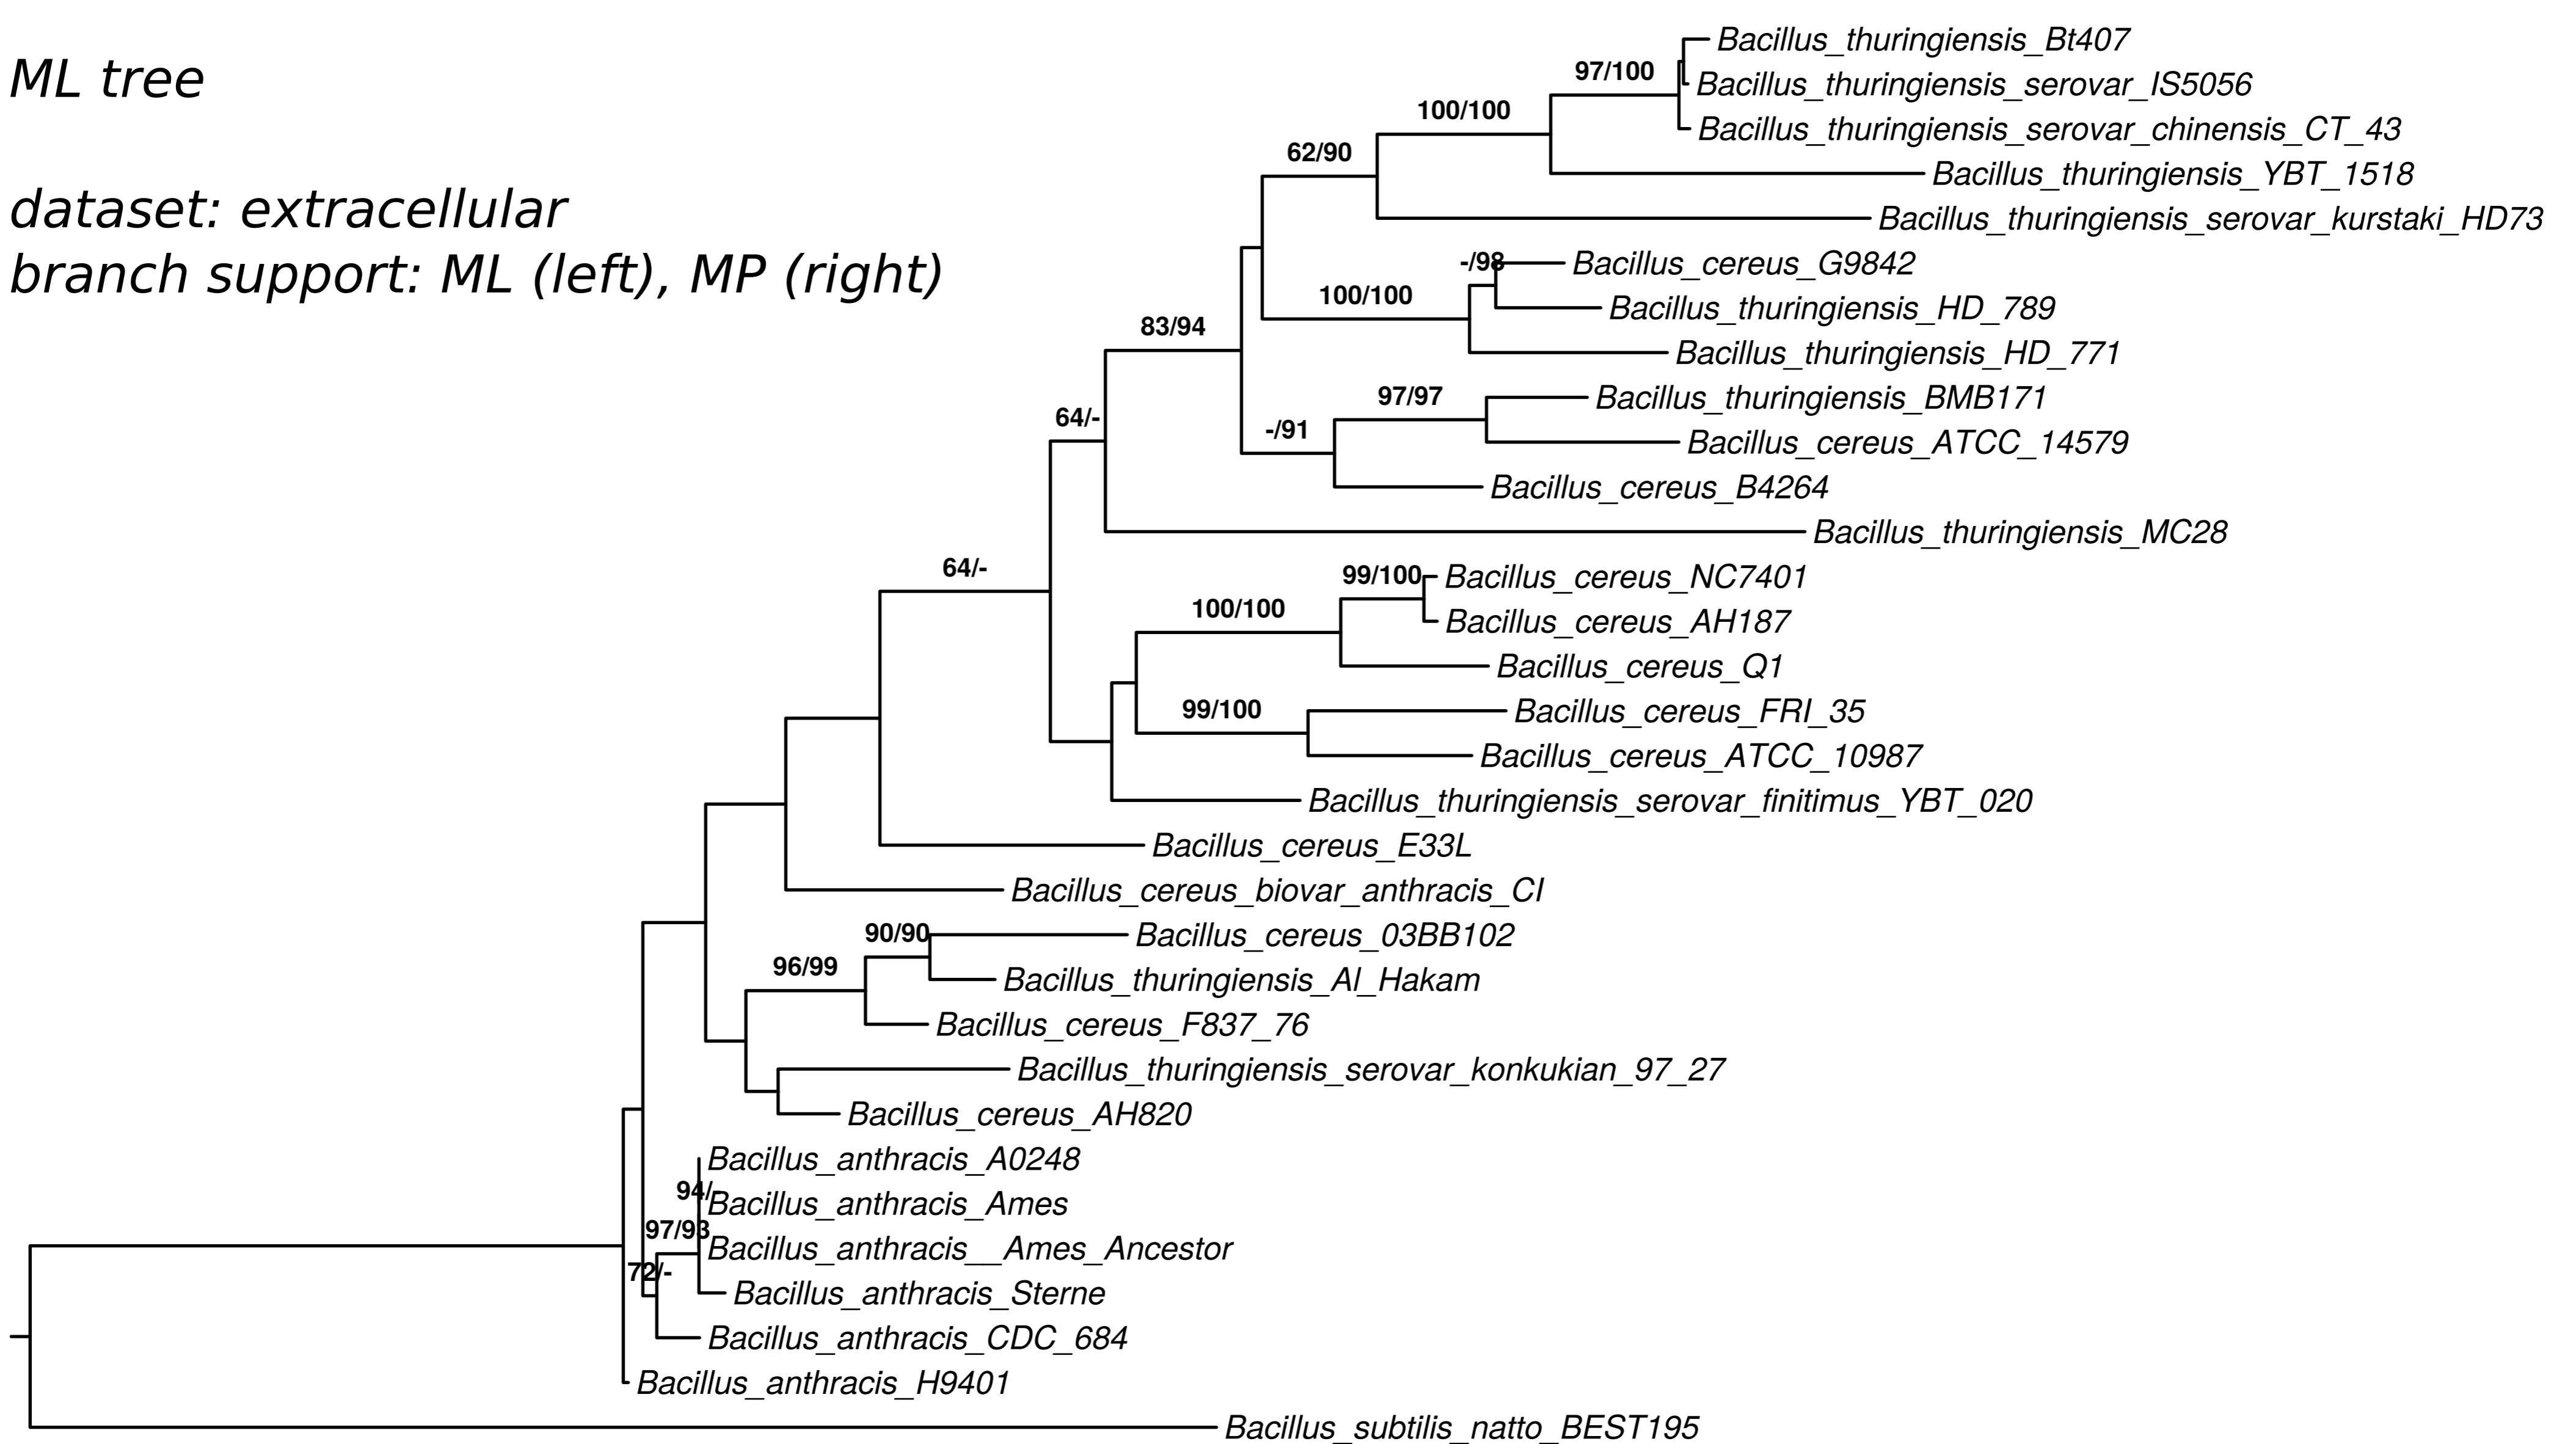

0.05

# MP tree

dataset: extracellular  
branch support: MP

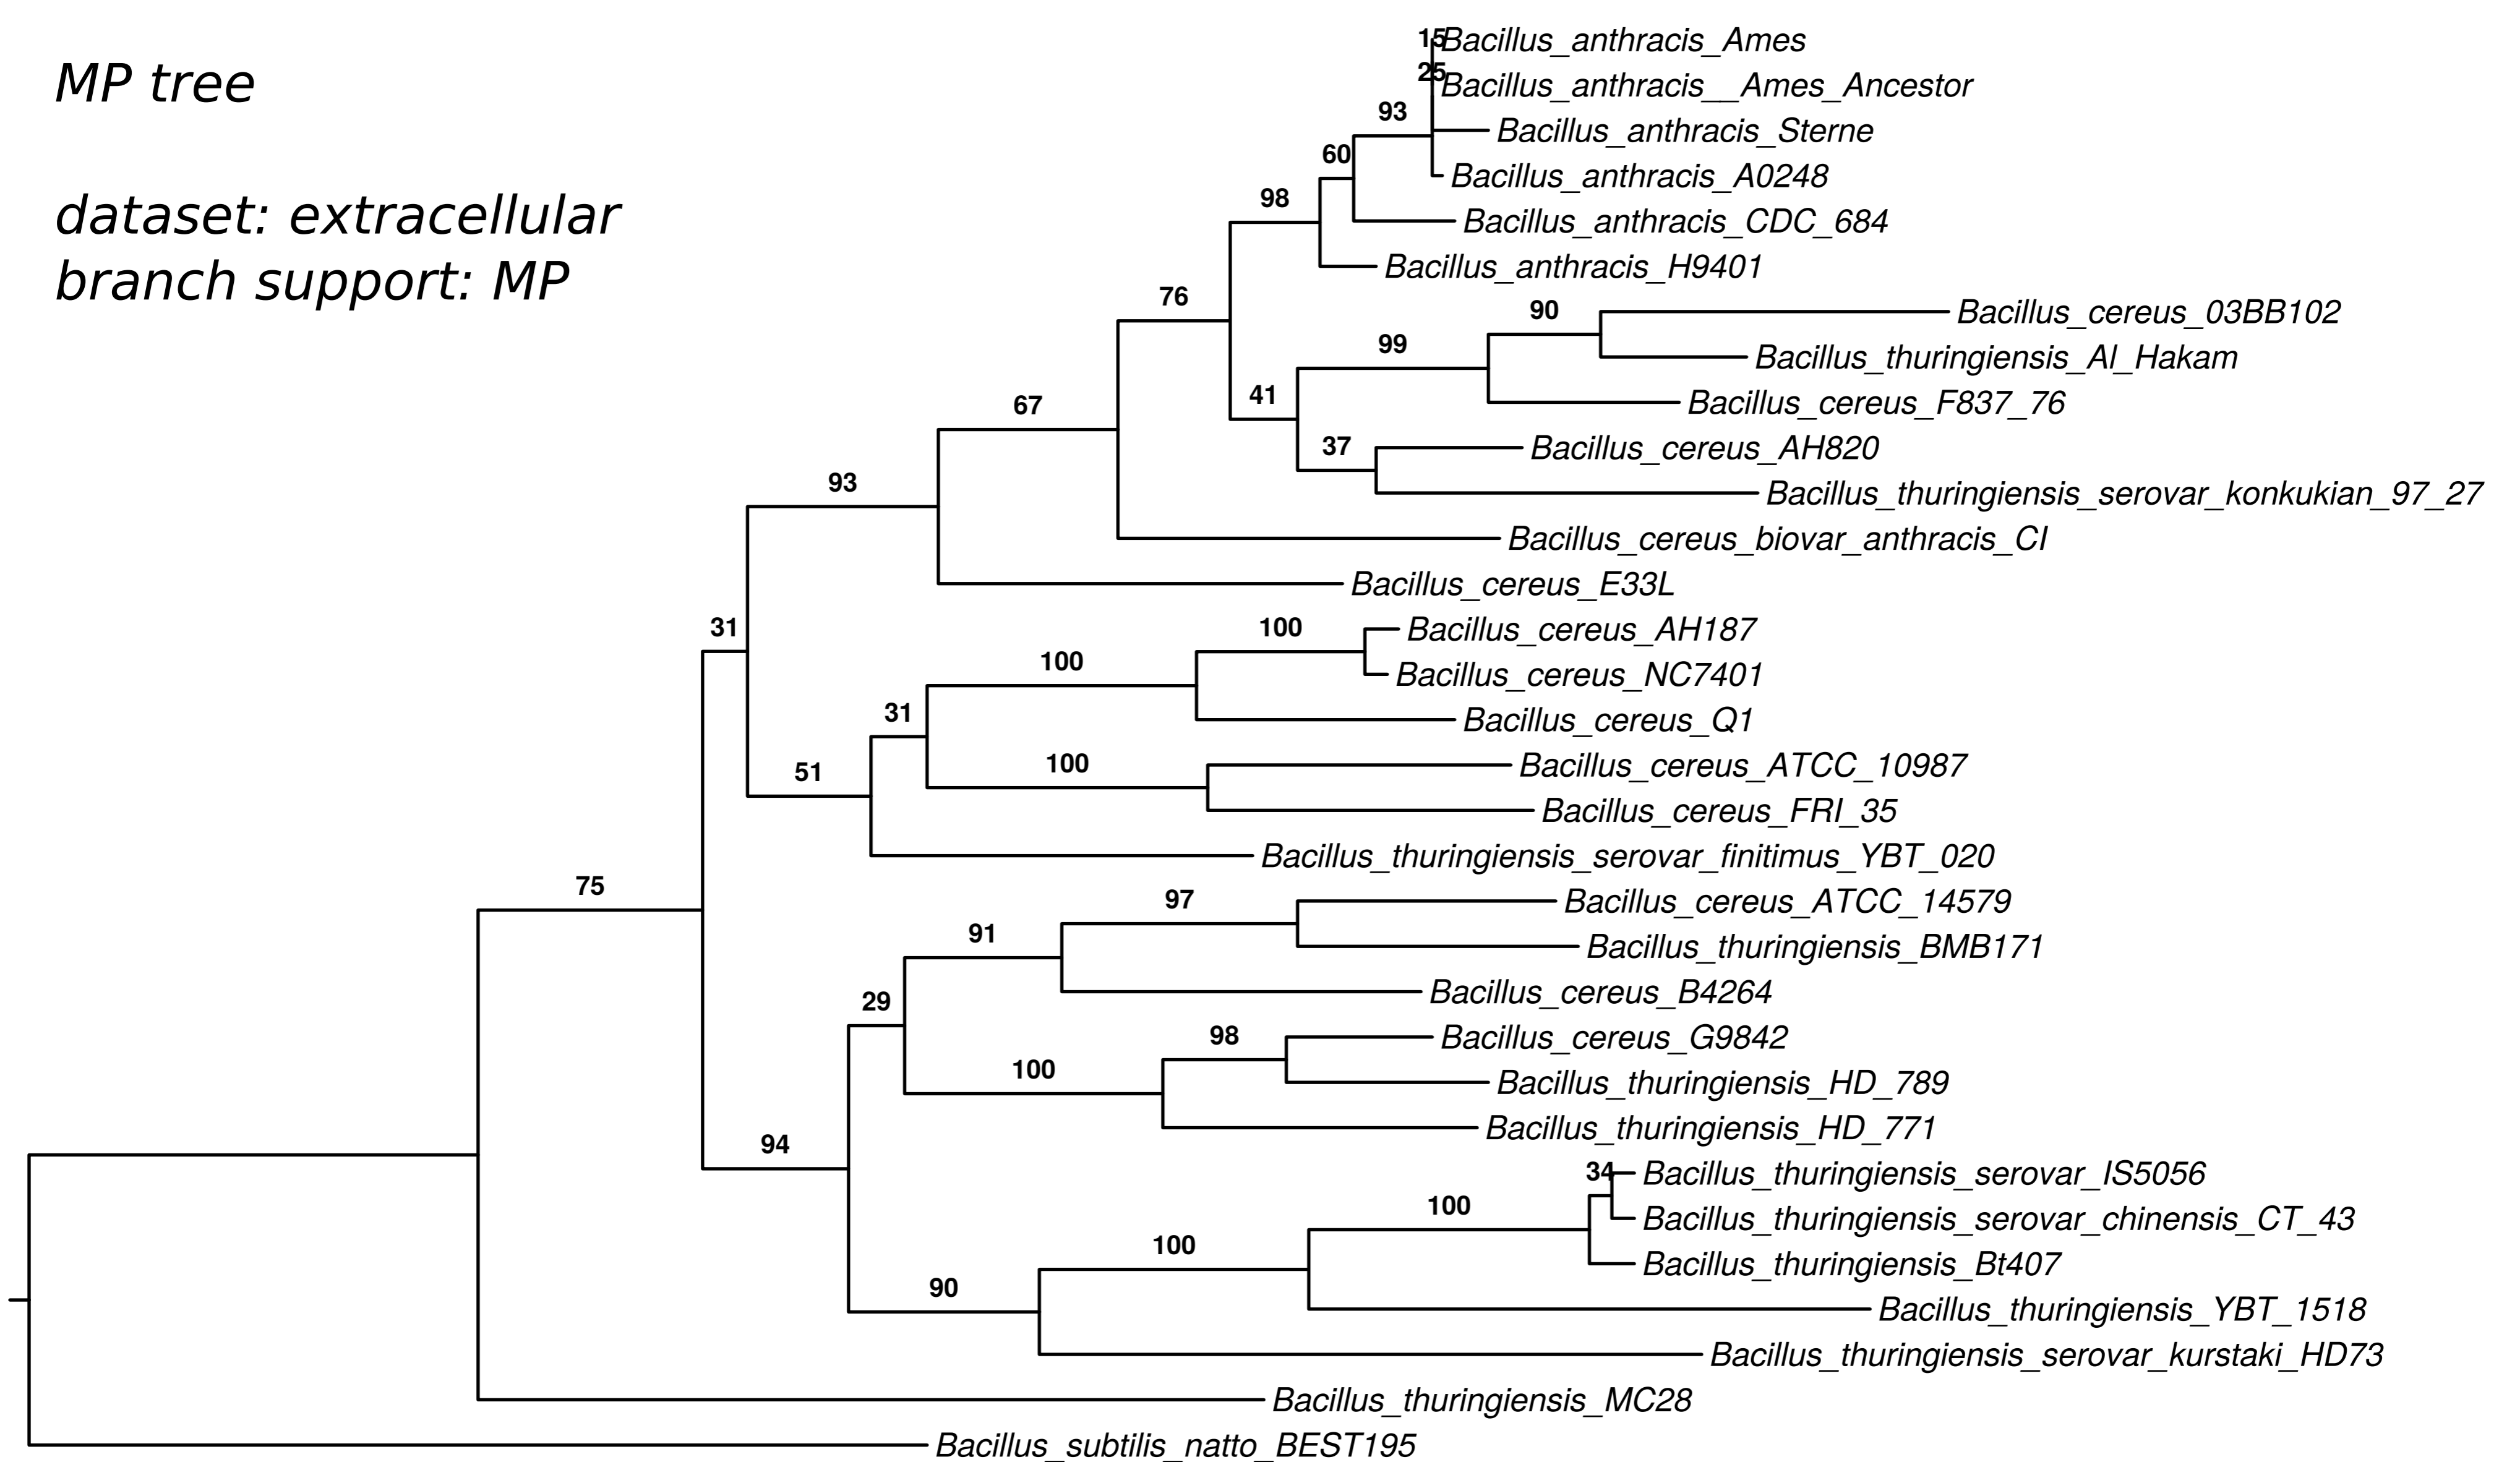

Supplement: pcbi.1005271.s001.pdf [file pcbi.1005271.s001.pdf]
