# Supplementary material for: Improving Phylogeny Reconstruction at the Strain Level Using Peptidome Datasets
Source: PubMed Central journal article supplement (PMC5198984; doi:10.1371/journal.pcbi.1005271), 2016-12-29

A

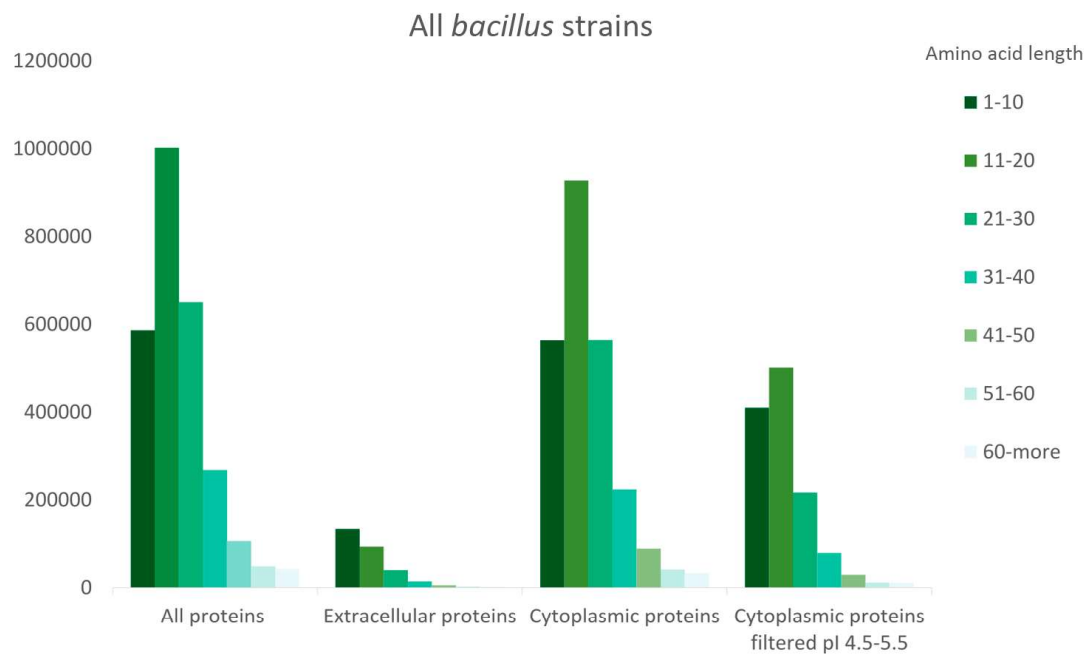

B

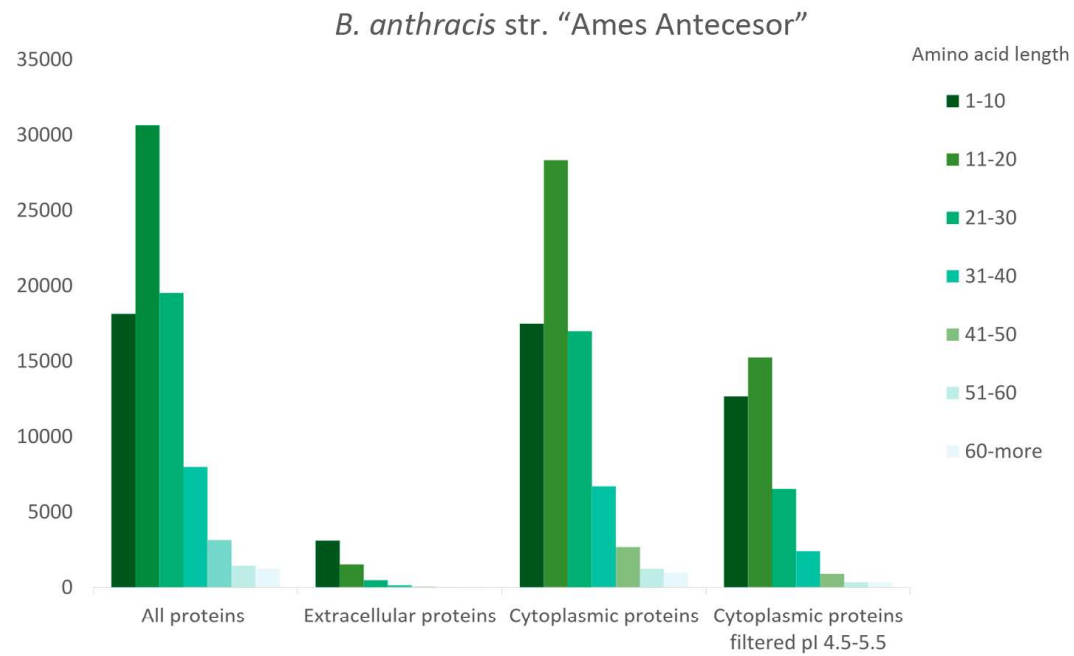

C

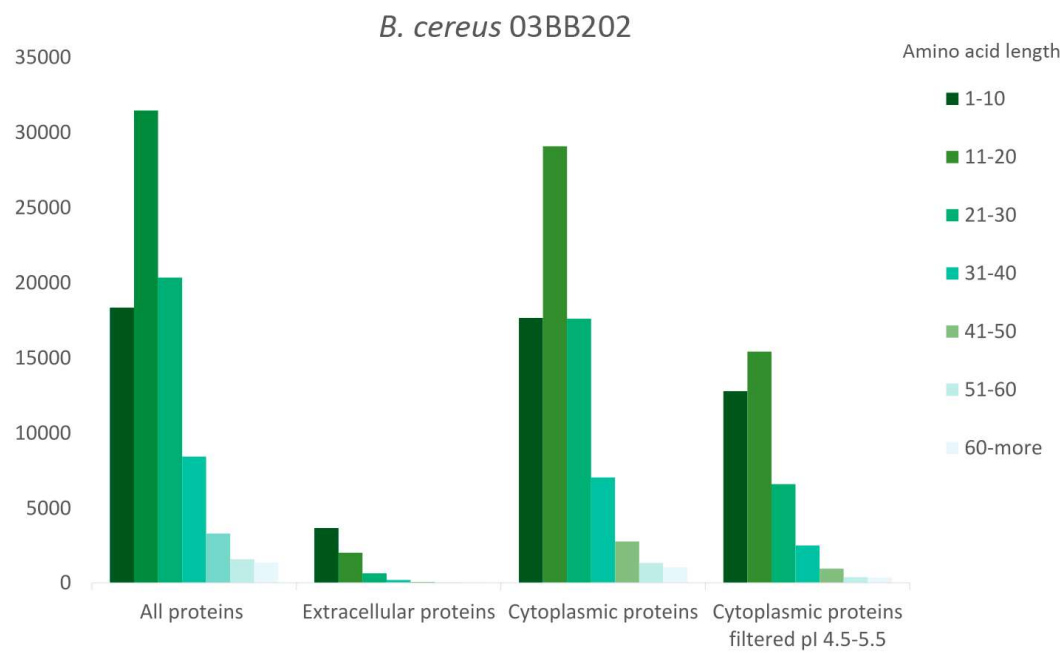

D

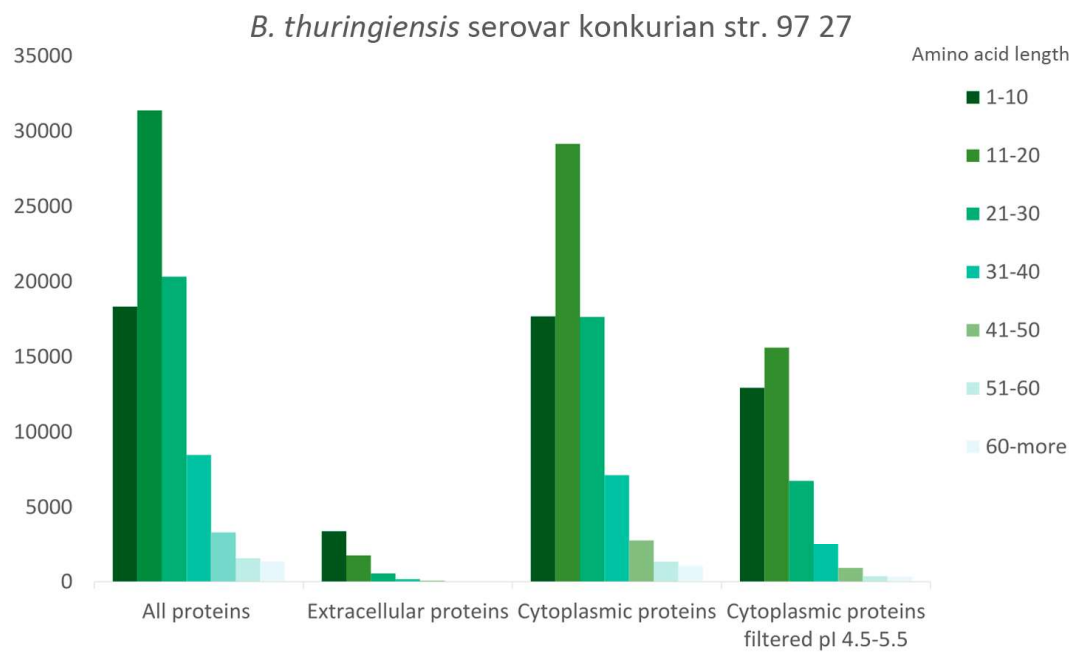

Supplement: pcbi.1005271.s002.pdf [file pcbi.1005271.s002.pdf]
